# Supplementary material for: Two novel 3D lanthanide supramolecular coordination polymers constructed from paddle wheel SBUs and hydrogen bonding: synthesis, structures and properties
Source: Royal Society of Chemistry journal article supplement (doi:10.1039/c4ra03976a), 2014-01-01
Supplement: c4ra03976a1.pdf [file c4ra03976a1.pdf]

## Supporting Information

### **Two novel 3D lanthanide supramolecular coordination polymers constructed by paddle wheel SBUs and hydrogen bonding: synthesis, structures and properties**

Qipeng Li,<sup>a,b</sup> and Shaowu Du<sup>\*a</sup>

<sup>a</sup> State Key Laboratory of Structural Chemistry, Fujian Institute of Research on the Structure of Matter, Chinese Academy of Sciences, Fuzhou, Fujian 350002, PR China

<sup>b</sup> University of Chinese Academy of Sciences, Beijing 100039, PR China

**Table S1** Pertinent Crystal Data and Structure Refinement Results for **1**

| <b>Compounds</b>                                | <b>1</b>                                                                       |
|-------------------------------------------------|--------------------------------------------------------------------------------|
| <b>CCDC</b>                                     | 874175                                                                         |
| <b>Formula</b>                                  | C <sub>40</sub> H <sub>28</sub> N <sub>3</sub> O <sub>17</sub> Tb <sub>2</sub> |
| <b>M<sub>r</sub>(g mol<sup>-1</sup>)</b>        | 1140.49                                                                        |
| <b>Space group</b>                              | <i>P</i> -1                                                                    |
| <b><i>a</i> (Å)</b>                             | 13.1321 (2)                                                                    |
| <b><i>b</i> (Å)</b>                             | 13.8370 (7)                                                                    |
| <b><i>c</i> (Å)</b>                             | 16.1264 (2)                                                                    |
| <b><math>\alpha</math> (deg)</b>                | 75.574 (14)                                                                    |
| <b><math>\beta</math> (deg)</b>                 | 66.288 (8)                                                                     |
| <b><math>\gamma</math> (deg)</b>                | 82.251 (15)                                                                    |
| <b><i>V</i> (Å<sup>3</sup>)</b>                 | 2596.35 (14)                                                                   |
| <b><i>Z</i></b>                                 | 2                                                                              |
| <b><i>D<sub>c</sub></i> (g cm<sup>-3</sup>)</b> | 1.459                                                                          |
| <b><math>\mu</math>(mm<sup>-1</sup>)</b>        | 2.765                                                                          |
| <b><i>F</i>(000)</b>                            | 1110.0                                                                         |
| <b>GOF</b>                                      | 1.077                                                                          |
| <b><i>R</i><sub>1</sub><sup>a</sup></b>         | 0.0275                                                                         |
| <b><i>wR</i><sub>2</sub><sup>a</sup></b>        | 0.0730                                                                         |

$$R = \sum (||F_o| - |F_c||) / \sum |F_o|, wR = \{ \sum w[(F_o^2 - F_c^2)^2] / \sum w[(F_o^2)^2] \}^{1/2}; [F_o > 4(F_c)].$$

**Table S2** Selected bond lengths (Å) and angles (°) for **1**

|                                          |             |                            |            |
|------------------------------------------|-------------|----------------------------|------------|
| Tb1—O3 <sup>i</sup>                      | 2.310 (3)   | O1—Tb2 <sup>vii</sup>      | 2.375 (3)  |
| Tb1—O10 <sup>ii</sup>                    | 2.311 (3)   | O2—Tb2 <sup>i</sup>        | 2.295 (2)  |
| Tb1—O4                                   | 2.330 (3)   | O3—Tb1 <sup>i</sup>        | 2.310 (3)  |
| Tb1—O9 <sup>iii</sup>                    | 2.390 (3)   | O5—Tb2 <sup>v</sup>        | 2.301 (2)  |
| Tb1—O13                                  | 2.416 (3)   | O10—Tb1 <sup>ii</sup>      | 2.311 (3)  |
| Tb1—O16                                  | 2.429 (2)   | O7—Tb1 <sup>viii</sup>     | 2.447 (3)  |
| Tb1—O7 <sup>iv</sup>                     | 2.447 (3)   | O8—Tb1 <sup>viii</sup>     | 2.467 (3)  |
| Tb1—O8 <sup>iv</sup>                     | 2.467 (3)   | C26—Tb1 <sup>viii</sup>    | 2.804 (4)  |
| Tb1—C26 <sup>iv</sup>                    | 2.804 (4)   | O9—Tb1 <sup>ix</sup>       | 2.390 (3)  |
| Tb2—O2 <sup>i</sup>                      | 2.295 (2)   | Tb2—O6                     | 2.389 (3)  |
| Tb2—O5 <sup>v</sup>                      | 2.301 (2)   | Tb2—O11                    | 2.426 (3)  |
| Tb2—O15                                  | 2.366 (3)   | Tb2—O14                    | 2.462 (3)  |
| Tb2—O1 <sup>vi</sup>                     | 2.375 (3)   | Tb2—O12                    | 2.472 (3)  |
| O3 <sup>i</sup> —Tb1—O10 <sup>ii</sup>   | 76.55 (10)  | Tb2—O15—H15B               | 123.7      |
| O3 <sup>i</sup> —Tb1—O4                  | 121.95 (10) | H15—O15—H15B               | 107.1      |
| O10 <sup>ii</sup> —Tb1—O4                | 76.01 (10)  | Tb1—O16—H16A               | 100.2      |
| O3 <sup>i</sup> —Tb1—O9 <sup>iii</sup>   | 75.31 (10)  | Tb1—O16—H16B               | 124.6      |
| O10 <sup>ii</sup> —Tb1—O9 <sup>iii</sup> | 122.43 (9)  | C26—O8—Tb1 <sup>viii</sup> | 91.6 (2)   |
| O4—Tb1—O9 <sup>iii</sup>                 | 78.09 (10)  | C38—O9—Tb1 <sup>ix</sup>   | 127.2 (2)  |
| O3 <sup>i</sup> —Tb1—O13                 | 78.14 (10)  | C38—O10—Tb1 <sup>ii</sup>  | 155.3 (3)  |
| O10 <sup>ii</sup> —Tb1—O13               | 78.23 (10)  | C39—O11—Tb2                | 93.3 (2)   |
| O4—Tb1—O13                               | 141.57 (11) | C39—O12—Tb2                | 91.5 (2)   |
| O9 <sup>iii</sup> —Tb1—O13               | 140.29 (10) | C40—O13—Tb1                | 136.7 (3)  |
| O3 <sup>i</sup> —Tb1—O16                 | 83.06 (9)   | C40—O14—Tb2                | 140.1 (3)  |
| O10 <sup>ii</sup> —Tb1—O16               | 146.03 (9)  | Tb2—O15—H15                | 125.4      |
| O4—Tb1—O16                               | 137.90 (10) | O1 <sup>vi</sup> —Tb2—O6   | 79.75 (10) |

|                                          |             |                           |             |
|------------------------------------------|-------------|---------------------------|-------------|
| O9 <sup>iii</sup> —Tb1—O16               | 76.79 (9)   | O6—Tb2—O11                | 134.55 (8)  |
| O13—Tb1—O16                              | 71.11 (9)   | O2 <sup>i</sup> —Tb2—O14  | 75.85 (10)  |
| O3 <sup>i</sup> —Tb1—O7 <sup>iv</sup>    | 150.48 (9)  | O5 <sup>v</sup> —Tb2—O14  | 75.34 (10)  |
| O10 <sup>ii</sup> —Tb1—O7 <sup>iv</sup>  | 132.88 (9)  | O15—Tb2—O14               | 72.53 (9)   |
| O4—Tb1—O7 <sup>iv</sup>                  | 72.43 (10)  | O1 <sup>vi</sup> —Tb2—O14 | 140.21 (10) |
| O9 <sup>iii</sup> —Tb1—O7 <sup>iv</sup>  | 83.93 (9)   | O6—Tb2—O14                | 139.63 (10) |
| O13—Tb1—O7 <sup>iv</sup>                 | 106.89 (10) | O11—Tb2—O14               | 75.36 (10)  |
| O16—Tb1—O7 <sup>iv</sup>                 | 71.78 (9)   | O2 <sup>i</sup> —Tb2—O12  | 149.42 (9)  |
| O3 <sup>i</sup> —Tb1—O8 <sup>iv</sup>    | 150.15 (10) | O5 <sup>v</sup> —Tb2—O12  | 131.39 (9)  |
| O10 <sup>ii</sup> —Tb1—O8 <sup>iv</sup>  | 85.64 (10)  | O15—Tb2—O12               | 73.34 (9)   |
| O4—Tb1—O8 <sup>iv</sup>                  | 75.18 (10)  | O1 <sup>vi</sup> —Tb2—O12 | 69.59 (9)   |
| O9 <sup>iii</sup> —Tb1—O8 <sup>iv</sup>  | 134.44 (9)  | O6—Tb2—O12                | 82.22 (9)   |
| O13—Tb1—O8 <sup>iv</sup>                 | 74.86 (10)  | O11—Tb2—O12               | 53.30 (9)   |
| O16—Tb1—O8 <sup>iv</sup>                 | 99.82 (9)   | O14—Tb2—O12               | 112.84 (10) |
| O7 <sup>iv</sup> —Tb1—O8 <sup>iv</sup>   | 53.09 (9)   | O2 <sup>i</sup> —Tb2—C39  | 166.79 (10) |
| O3 <sup>i</sup> —Tb1—C26 <sup>iv</sup>   | 168.73 (10) | O5 <sup>v</sup> —Tb2—C39  | 109.08 (11) |
| O10 <sup>ii</sup> —Tb1—C26 <sup>iv</sup> | 108.78 (11) | O15—Tb2—C39               | 85.53 (11)  |
| O4—Tb1—C26 <sup>iv</sup>                 | 69.30 (10)  | O1 <sup>vi</sup> —Tb2—C39 | 69.48 (10)  |
| O9 <sup>iii</sup> —Tb1—C26 <sup>iv</sup> | 108.48 (11) | O6—Tb2—C39                | 108.03 (10) |
| O13—Tb1—C26 <sup>iv</sup>                | 93.04 (11)  | O11—Tb2—C39               | 26.84 (10)  |
| O16—Tb1—C26 <sup>iv</sup>                | 87.48 (10)  | O14—Tb2—C39               | 95.51 (11)  |
| O7 <sup>iv</sup> —Tb1—C26 <sup>iv</sup>  | 26.49 (10)  | O12—Tb2—C39               | 26.54 (10)  |
| O8 <sup>iv</sup> —Tb1—C26 <sup>iv</sup>  | 26.83 (10)  | C12—O1—Tb2 <sup>vii</sup> | 134.2 (2)   |
| O2 <sup>i</sup> —Tb2—O5 <sup>v</sup>     | 78.75 (10)  | C12—O2—Tb2 <sup>i</sup>   | 152.0 (3)   |
| O2 <sup>i</sup> —Tb2—O15                 | 82.35 (10)  | C13—O3—Tb1 <sup>i</sup>   | 146.0 (2)   |
| O5 <sup>v</sup> —Tb2—O15                 | 145.81 (9)  | C13—O4—Tb1                | 140.4 (2)   |
| O2 <sup>i</sup> —Tb2—O1 <sup>vi</sup>    | 123.49 (10) | C25—O5—Tb2 <sup>v</sup>   | 162.2 (2)   |
| O5 <sup>v</sup> —Tb2—O1 <sup>vi</sup>    | 75.49 (10)  | C25—O6—Tb2                | 122.1 (2)   |

|                          |            |                            |            |
|--------------------------|------------|----------------------------|------------|
| O15—Tb2—O1 <sup>vi</sup> | 138.35 (9) | C26—O7—Tb1 <sup>viii</sup> | 92.9 (2)   |
| O2 <sup>i</sup> —Tb2—O6  | 74.34 (10) | O5 <sup>v</sup> —Tb2—O6    | 123.69 (9) |
| O15—Tb2—O6               | 77.05 (10) |                            |            |

Symmetry codes: (i)  $-x+2, -y, -z$ ; (ii)  $-x+2, -y+1, -z$ ; (iii)  $x, y-1, z$ ; (iv)  $x+1, y, z$ ; (v)  $-x+1, -y+1, -z$ ; (vi)  $x-1, y+1, z$ ; (vii)  $x+1, y-1, z$ ; (viii)  $x-1, y, z$ ; (ix)  $x, y+1, z$ .

**Table S3** Bond lengths (Å) and angles (°) of hydrogen bonds for **1**

| <i>D—H···A</i>              | <i>D—H</i> | <i>H···A</i> | <i>D···A</i> | <i>D—H···A</i> |
|-----------------------------|------------|--------------|--------------|----------------|
| N1-H1B···O16 <sup>iii</sup> | 0.86       | 2.09         | 2.788 (4)    | 138            |
| O15-H15···O13               | 0.85       | 2.00         | 2.750 (4)    | 147            |
| O15-H15···O16               | 0.85       | 2.60         | 3.283(4)     | 138            |
| O15-H15B···N3 <sup>i</sup>  | 0.85       | 1.92         | 2.750 (4)    | 166            |
| O16-H16B···N2 <sup>ii</sup> | 0.85       | 2.03         | 2.874 (5)    | 170            |

Symmetry codes: (i)  $-x+1, -y+1, -z+1$ ; (ii)  $-x+1, -y, -z+1$ ; (iii)  $x+1, y, z$ .

**Table S4** Quantum yields and lifetimes of **1** and **2** at 298, 77 and 10 K

| Compound | Temperature (K) | Lifetime(ms) |          | Quantum Yields $\Phi_f^c$ | $\lambda_{ex}(nm)$ |
|----------|-----------------|--------------|----------|---------------------------|--------------------|
|          |                 | $\tau_1$     | $\tau_2$ |                           |                    |
| <hr/>    |                 |              |          |                           |                    |

|          |     |                |                |        |     |
|----------|-----|----------------|----------------|--------|-----|
|          | 298 | 0.6935(85.04%) | 0.1876(14.96%) | 17.40% | 310 |
| <b>1</b> | 77  | 0.9778(93.43%) | 0.3116(6.57%)  | 39.05% | 310 |
|          | 10  | 1.0000(100%)   | 0              | 44.66% | 310 |
|          | 298 | 0.7653(67.18%) | 0.3264(32.82%) | 5.49%  | 338 |
| <b>2</b> | 77  | 1.086(81.36%)  | 0.3480(18.64%) | 22.84% | 338 |
|          | 10  | 1.185(96.03%)  | 0.372(3.97%)   | 26.75% | 338 |

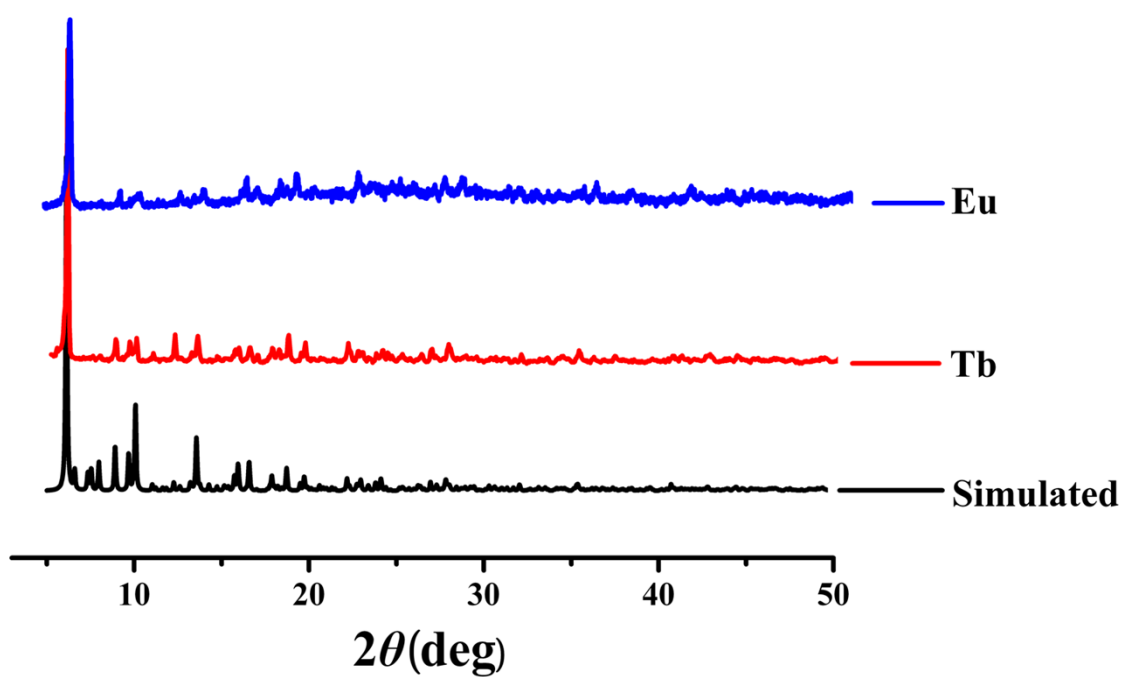

**Fig. S1** X-ray powder diffraction (XRPD) patterns of **1** (Tb) and **2** (Eu)

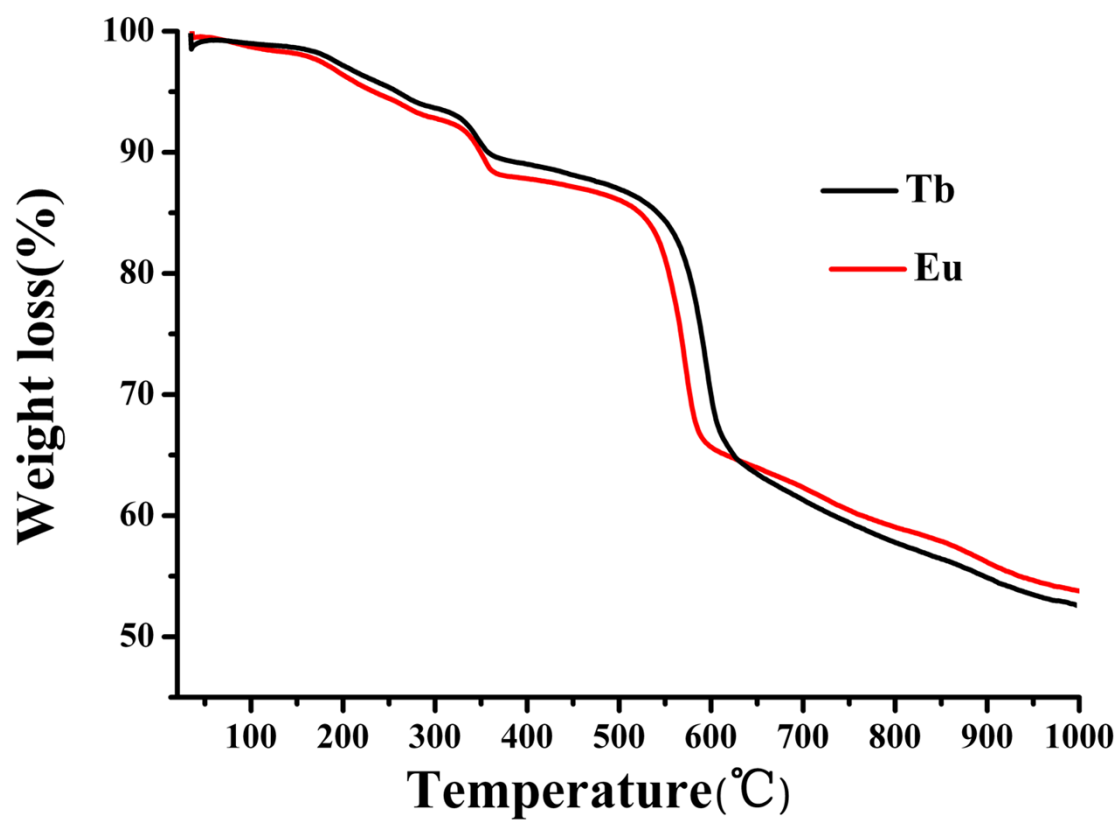

Fig. S2 View of the TGA curves of 1 (Tb) and 2 (Eu)

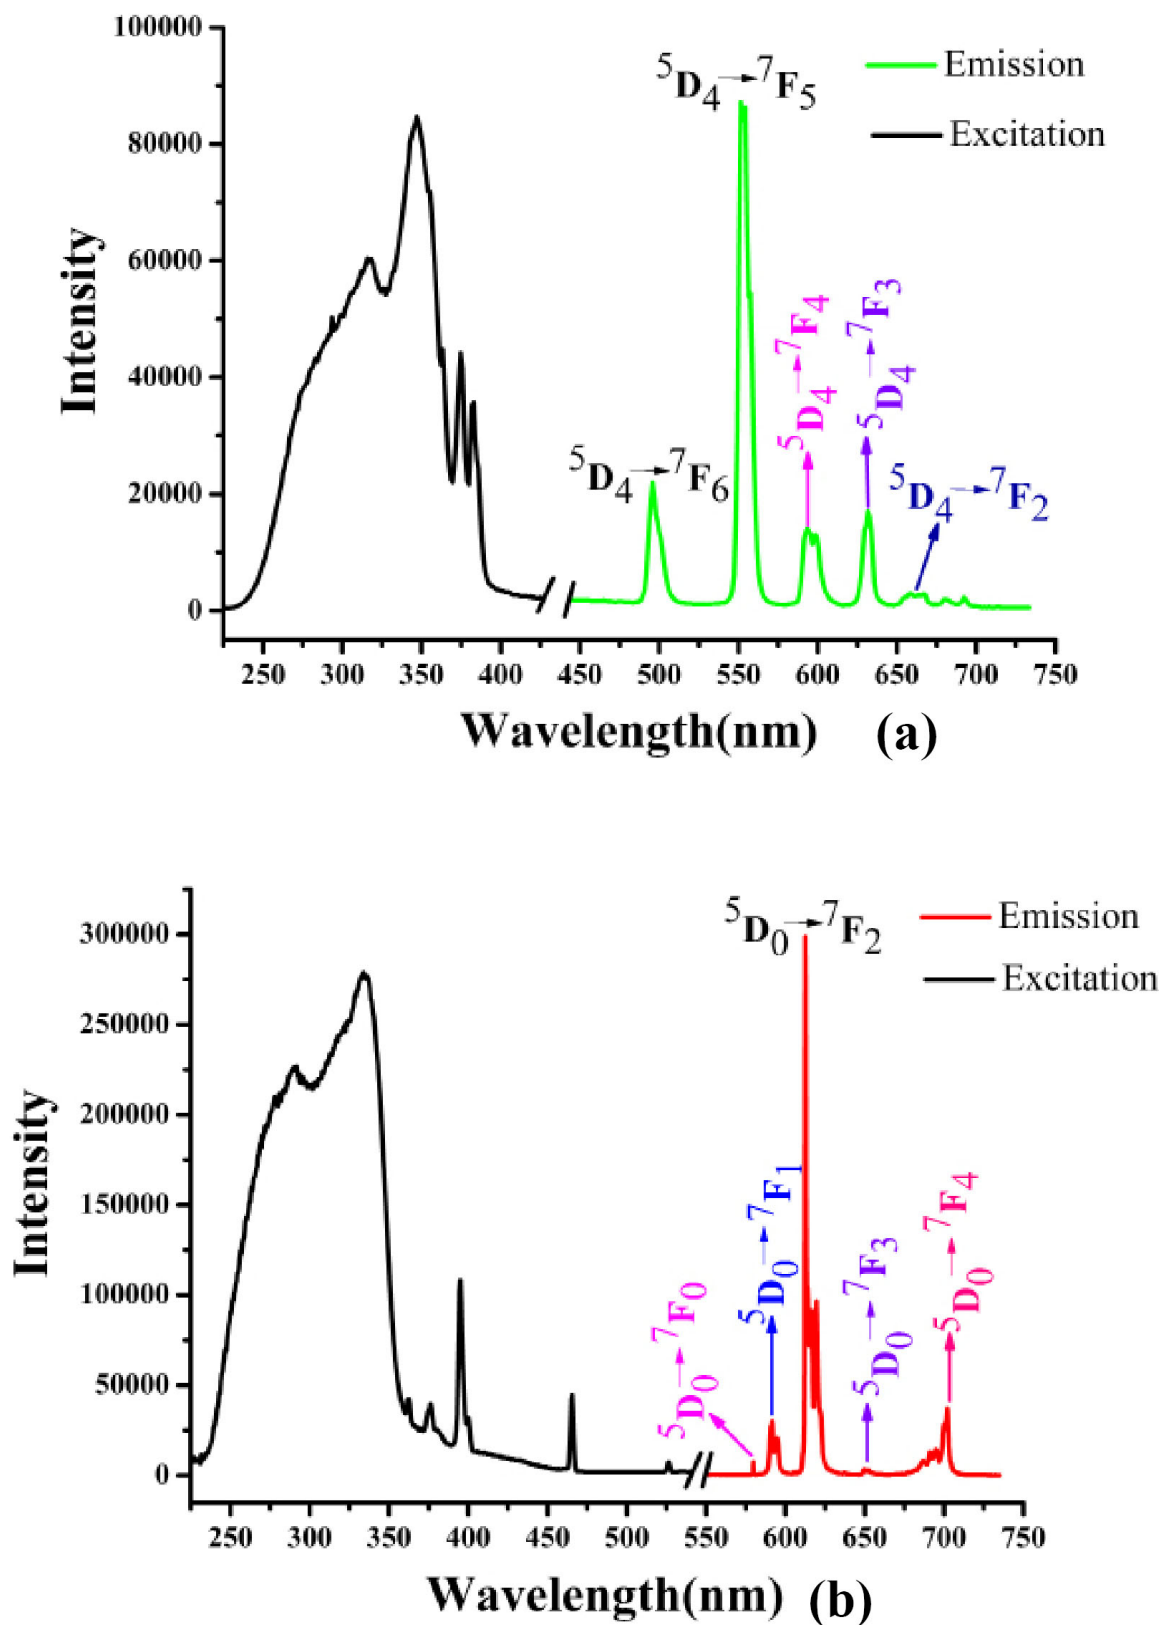

Fig S3 Solid-state excitation and emission spectra for **1** (a) and **2** (b) at room temperature



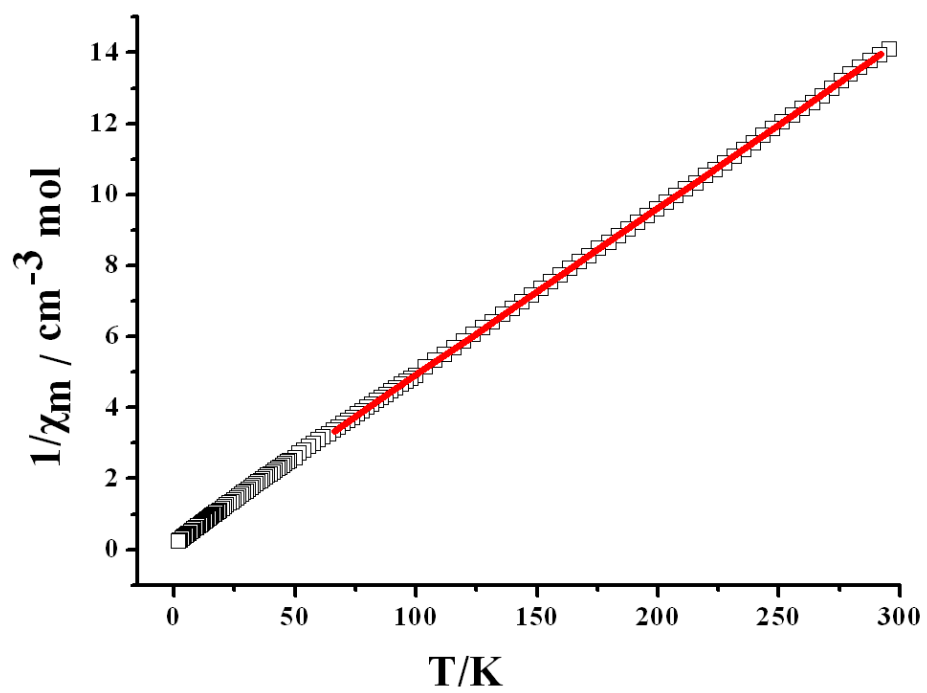

**Fig S4** The red line shows the Curie–Weiss fitting for **1**.
